# Supplementary material for: Apigenin, a Single Active Component of Herbal Extract, Alleviates Xerostomia via ERα-Mediated Upregulation of AQP5 Activation
Source: Front Pharmacol. 2022 Feb 21;13:818116. doi: 10.3389/fphar.2022.818116 (PMC8899471; doi:10.3389/fphar.2022.818116)
Supplement: Supplementary file 2 [file Table3.XLSX]

## Sheet: fig2A
Block Type	96-Well 0.2-mL Block
Calibration Background is expired	No
Calibration Background performed on	01-30-2019
Calibration Pure Dye ABY is expired	No
Calibration Pure Dye ABY performed on	01-30-2019
Calibration Pure Dye FAM is expired	No
Calibration Pure Dye FAM performed on	01-30-2019
Calibration Pure Dye JUN is expired	No
Calibration Pure Dye JUN performed on	01-30-2019
Calibration Pure Dye NED is expired	No
Calibration Pure Dye NED performed on	01-30-2019
Calibration Pure Dye ROX is expired	No
Calibration Pure Dye ROX performed on	01-30-2019
Calibration Pure Dye SYBR is expired	No
Calibration Pure Dye SYBR performed on	01-30-2019
Calibration Pure Dye TAMRA is expired	No
Calibration Pure Dye TAMRA performed on	01-30-2019
Calibration Pure Dye VIC is expired	No
Calibration Pure Dye VIC performed on	01-30-2019
Calibration ROI is expired	No
Calibration ROI performed on	01-30-2019
Calibration Uniformity is expired	No
Calibration Uniformity performed on	01-30-2019
Chemistry	SYBR_GREEN
Date Created	2020-12-20 21:05:25 PM CST
Experiment Barcode
Experiment Comment
Experiment File Name	D:\LLYY\11\6662020-11-24_LLLYYY.eds
Experiment Name	2020-12-19_LLLYYY
Experiment Run End Time	2020-12-20 04:56:00 AM CST
Experiment Type	Comparative Cт (ΔΔCт)
Instrument Name	272323269
Instrument Serial Number	272323269
Instrument Type	QuantStudio™ 3 System
Passive Reference	ROX
Post-read Stage/Step
Pre-read Stage/Step
Quantification Cycle Method	Ct
Signal Smoothing On	true
Stage where Melt Analysis is performed	Stage3
Stage/ Cycle where Ct Analysis is performed	Stage2, Step2
User Name
Well	Well Position	Omit	Sample Name	Target Name	Task	Reporter	Quencher	Quantity	Quantity Mean	Quantity SD	RQ	RQ Min	RQ Max	CT	Ct Mean	Ct SD	Delta Ct	Delta Ct Mean	Delta Ct SD	Delta Ct SE	Delta Delta Ct	Automatic Ct Threshold	Ct Threshold	Automatic Baseline	Baseline Start	Baseline End	Amp Status	Comments	Cq Conf	MTP	Tm1	Tm2	Tm3	Tm4
5	A5	FALSE	PBS	β-actin	UNKNOWN	SYBR	None							25.1387	25.1532	0.16855						TRUE	0.122773	TRUE	3	20	Amp		0.982394	N	85.2561
6	A6	FALSE	PBS	β-actin	UNKNOWN	SYBR	None							24.9923	25.1532	0.16855						TRUE	0.122773	TRUE	3	20	Amp		0.983593	N	85.2049
7	A7	FALSE	PBS	β-actin	UNKNOWN	SYBR	None							25.3285	25.1532	0.16855						TRUE	0.122773	TRUE	3	20	Amp		0.983376	N	85.5575
17	B5	FALSE	10-8M	β-actin	UNKNOWN	SYBR	None							25.7348	26.0228	0.335001						TRUE	0.122773	TRUE	3	21	Amp		0.983023	N	85.5575
18	B6	FALSE	10-8M	β-actin	UNKNOWN	SYBR	None							26.6401	26.0228	0.335001						TRUE	0.122773	TRUE	3	22	Amp		0.986361	N	85.3396
19	B7	FALSE	10-8M	β-actin	UNKNOWN	SYBR	None							25.6935	26.0228	0.335001						TRUE	0.122773	TRUE	3	21	Amp		0.98792	N	85.3396
29	C5	FALSE	10-7M	β-actin	UNKNOWN	SYBR	None							26.0591	25.9939	0.10346						TRUE	0.122773	TRUE	3	21	Amp		0.978654	N	85.202
30	C6	FALSE	10-7M	β-actin	UNKNOWN	SYBR	None							25.8746	25.9939	0.10346						TRUE	0.122773	TRUE	3	21	Amp		0.986382	N	85.202
31	C7	FALSE	10-7M	β-actin	UNKNOWN	SYBR	None							26.048	25.9939	0.10346						TRUE	0.122773	TRUE	3	21	Amp		0.986322	N	85.1869
41	D5	FALSE	10-6M	β-actin	UNKNOWN	SYBR	None							25.9213	25.9992	0.110197						TRUE	0.122773	TRUE	3	20	Amp		0.988487	N	85.238
42	D6	FALSE	10-6M	β-actin	UNKNOWN	SYBR	None							26.1251	25.9992	0.110197						TRUE	0.122773	TRUE	3	20	Amp		0.980342	N	85.2885
43	D7	FALSE	10-6M	β-actin	UNKNOWN	SYBR	None							25.9512	25.9992	0.110197						TRUE	0.122773	TRUE	3	21	Amp		0.986612	N	85.3909
53	E5	FALSE	E210-7M	β-actin	UNKNOWN	SYBR	None							25.6288	25.703	0.0707244						TRUE	0.122773	TRUE	3	21	Amp		0.987888	N	80.2358	83.4119
54	E6	FALSE	E210-7M	β-actin	UNKNOWN	SYBR	None							25.7696	25.703	0.0707244						TRUE	0.122773	TRUE	3	21	Amp		0.986647	N	80.2358	83.4119
55	E7	FALSE	E210-7M	β-actin	UNKNOWN	SYBR	None							25.7105	25.703	0.0707244						TRUE	0.122773	TRUE	3	21	Amp		0.975599	N	80.5895	83.7137
56	A8	FALSE	PBS	AQP5	UNKNOWN	SYBR	None							28.112	28.201	0.221						TRUE	0.0748651	TRUE	3	12	Amp		0.918621	N	80.5383	83.7137
57	A9	FALSE	PBS	AQP5	UNKNOWN	SYBR	None							28.023	28.201	0.221						TRUE	0.0748651	TRUE	3	12	Amp		0.986648	N	80.4325	83.6016
58	A10	FALSE	PBS	AQP5	UNKNOWN	SYBR	None							28.468	28.201	0.221						TRUE	0.0748651	TRUE	3	11	Amp		0.983367	N	80.3814	83.6016
59	B8	FALSE	API 10-8M	AQP5	UNKNOWN	SYBR	None							28.349	28.4243	0.240045					0.1419	TRUE	0.08697	TRUE	3	12	Amp		0.919918	N	75.7773
60	B9	FALSE	API 10-8M	AQP5	UNKNOWN	SYBR	None							28.513	28.4243	0.240045		4.00407			0.1419	TRUE	0.04	TRUE	3	17	Amp		0.98747	N	75.7773
61	B10	FALSE	API 10-8M	AQP5	UNKNOWN	SYBR	None							28.411	28.4243	0.240045		4.00407			0.1419	TRUE	0.04	TRUE	3	17	Amp		0.981969	N	75.7676
62	C8	FALSE	API 10-7M	AQP5	UNKNOWN	SYBR	None							27.833	27.5557	0.0518205		4.00407			0.248006	TRUE	0.04	TRUE	3	17	Amp		0.979653	N	75.8188
63	C9	FALSE	API 10-7M	AQP5	UNKNOWN	SYBR	None							27.551	27.5557	0.0518205					0.248006	TRUE	0.08697	TRUE	3	12	Amp		0.511102	Y	75.8183
64	C10	FALSE	API 10-7M	AQP5	UNKNOWN	SYBR	None							27.283	27.5557	0.0518205		2.39476			0.248006	TRUE	0.08987	TRUE	3	14	Amp		0.978507	N	75.8695
65	D8	FALSE	API 10-6M	AQP5	UNKNOWN	SYBR	None							27.109	26.9327	0.0783084		2.39476			0.141782	TRUE	0.08987	TRUE	3	14	Amp		0.987335	N	82.8484
66	D9	FALSE	API 10-6M	AQP5	UNKNOWN	SYBR	None							26.574	26.9327	0.0783084		2.39476			0.141782	TRUE	0.08987	TRUE	3	14	Amp		0.9843	N	82.8484
67	D10	FALSE	API 10-6M	AQP5	UNKNOWN	SYBR	None							27.115	26.9327	0.0783084					0.141782	TRUE	0.0748651	TRUE	3	12	Amp		0.918621	N	83.0991
68	E8	FALSE	E210-7M	AQP5	UNKNOWN	SYBR	None							26.923	26.9233	0.121732					0.145778	TRUE	0.0748651	TRUE	3	12	Amp		0.986648	N	83.1503
69	E9	FALSE	E210-7M	AQP5	UNKNOWN	SYBR	None							27.045	26.9233	0.121732					0.145778	TRUE	0.0748651	TRUE	3	11	Amp		0.983367	N	82.9883
70	E10	FALSE	E210-7M	AQP5	UNKNOWN	SYBR	None							26.801	26.9233	0.121732					0.145778	TRUE	0.08697	TRUE	3	12	Amp		0.919918	N	82.9883
Analysis Type	Singleplex
Endogenous Control	1
RQ Min/Max Confidence Level	95.0
Reference Sample	7

## Sheet: fig2A-
	PBS	API 10-8M	API 10-7M	API 10-6M	E210-7M
AQP5 CT	28.201	28.4243	27.5557	26.9327	26.9233
actin CT	25.1532	26.0228	25.9939	25.9992	25.703
△CT	3.04783	2.4015	1.56173	0.933507	1.22029
△△CT	0	-0.646328	-1.4861	-2.11433	-1.82754
2-△△CT	1	1.56518	2.80131	4.32987	3.54931
SD		0.110378	0.438277	0.573042	0.246586
