# Supplementary material for: Apigenin, a Single Active Component of Herbal Extract, Alleviates Xerostomia via ERα-Mediated Upregulation of AQP5 Activation
Source: Front Pharmacol. 2022 Feb 21;13:818116. doi: 10.3389/fphar.2022.818116 (PMC8899471; doi:10.3389/fphar.2022.818116)
Supplement: Supplementary file 3 [file Table4.XLS]

## Sheet: fig3c
Group	AQP5	P7	AQP5/P7	AVERAGE	STDEV	AQP5/P7(relative)	AVERAGE(relative)	STDEV(relative)P	P
D180	55.24	3312	0.0166787	0.0135221	0.00307995	1.23345	1	0.227772	0.0383803
	53.73	4021	0.0133623			0.988189
	44.3	4209	0.0105251			0.778363
ERa	151.5	7676	0.0197368	0.02906	0.00829797	1.4596	2.14909	0.613662
	182.1	5110	0.035636			2.6354
	260.12	8178	0.0318073			2.35225
ERash	18.31	3906	0.00468766	0.00423132	0.00201827	0.346668	0.31292	0.149258	0.00730396
	18.3	3059	0.00598235			0.442414
	12.34	6097	0.00202395			0.149677
D180 Api	133.261	3492	0.0381618	0.0332658	0.00464853	2.82219	2.46012	0.343774	0.000190016
	105.877	3662	0.0289123			2.13816
	157.301	4807	0.0327233			2.42
ERa Api	387.42	3901	0.099313	0.106776	0.00844759	7.34452	7.89642	0.624727
	427.73	4071	0.105068			7.77009
	503.79	4345	0.115947			8.57466
ERash Api	26.75	3011	0.00888409	0.010526	0.00325967	0.657008	0.778431	0.241063	0.00226729
	29.852	3548	0.00841375			0.622225
	43.383	3038	0.0142801			1.05606
