# Supplementary material for: Apigenin, a Single Active Component of Herbal Extract, Alleviates Xerostomia via ERα-Mediated Upregulation of AQP5 Activation
Source: Front Pharmacol. 2022 Feb 21;13:818116. doi: 10.3389/fphar.2022.818116 (PMC8899471; doi:10.3389/fphar.2022.818116)
Supplement: Supplementary file 4 [file Table2.XLS]

## Sheet: fig1D
Group	AQP5	P7	AQP5/P7	AVERAGE	STDEV	AQP5/P7(relative)	AVERAGE(relative)	STDEV(relative)	P
PBS	4.176	999.8	0.00417684	0.0034107	0.00136845	1.22463	1	0.401222
	2.164	1182	0.0018308			0.536779
	4.031	954.2	0.00422448			1.2386
Apigenin（10-8M）	6.75	1165	0.00579399	0.00601824	0.00094957	1.69877	1.76451	0.278409	0.0534538
	8.02	1136	0.00705986			2.06991
	7.25	1394	0.00520086			1.52486
Apigenin（10-7M）	6.41	997.2	0.006428	0.00814572	0.00160488	1.88465	2.38828	0.470541	0.0177126
	9.847	1025	0.00960683			2.81667
	8.383	997.7	0.00840233			2.46352
Apigenin（10-6M）	11.05	885.1	0.0124845	0.0107231	0.00157789	3.66038	3.14396	0.462628	0.00373429
	12.07	1178	0.0102462			3.00412
	9.367	992.4	0.00943873			2.76739
E2（10-7M）	9.76	1388	0.0070317	0.00699303	0.00052095	2.06166	2.13826	0.15274	0.0100893
	7.437	1069.4	0.00695437			2.03898
	8.84	1120	0.00789286			2.31414
