# Supplementary material for: Apigenin, a Single Active Component of Herbal Extract, Alleviates Xerostomia via ERα-Mediated Upregulation of AQP5 Activation
Source: Front Pharmacol. 2022 Feb 21;13:818116. doi: 10.3389/fphar.2022.818116 (PMC8899471; doi:10.3389/fphar.2022.818116)
Supplement: Supplementary file 9 [file Table6.XLSX]

## Sheet: FIG6C 0w
Before ovariectomy
		Water intake(mL)	Body weight(g)	Water intake(mL)/Body weight(g)
Control	Y58	25	30	0.833333
	Y59	24	29	0.827586
	Y60	27	31	0.870968
	Y61	30	29	1.03448
	Y62	24	30	0.8
	Y63	31	30	1.03333
OVX	Y64	30	31.5	0.952381
	Y65	30	30	1
	Y66	28	29	0.965517
	Y67	29	30	0.966667
	Y68	30	29	1.03448
	Y69	29	30	0.966667
Apigenin	Y25	26	29	0.896552
	Y26	26	29	0.896552
	Y21	32	27	1.18519
	Y22	32	33	0.969697
	Y23	29	30	0.966667
	Y24	28	29	0.965517
E2	Y1	34	32	1.0625
	Y2	33	32	1.03125
	Y3	34	31	1.09677
	Y4	28	30	0.933333
	Y5	32	30	1.06667
	Y6	31	30	1.03333

## Sheet: FIG6C 4w
4 weeks treatment
		Water intake(mL)	Body weight(g)	Water intake(mL)/Body weight(g)
Control	Y58	28	31	0.903226
	Y59	27	32	0.84375
	Y60	27	32	0.84375
	Y61	32	33	0.969697
	Y62	31	31	1
	Y63	30	32	0.9375
OVX	Y64	38.5	32	1.20312
	Y65	37	31	1.19355
	Y66	36	30	1.2
	Y67	39	31	1.25806
	Y68	38	32	1.1875
	Y69	38	31	1.22581
Apigenin	Y25	30	30	1
	Y26	32	30	1.06667
	Y21	33	28	1.17857
	Y22	34	33	1.0303
	Y23	32	31	1.03226
	Y24	33	31	1.06452
E2	Y1	39	35	1.11429
	Y2	38	34	1.11765
	Y3	37	32	1.15625
	Y4	38	32	1.1875
	Y5	38	32	1.1875
	Y6	36	31.5	1.14286

## Sheet: FIG6C 8w
8 weeks treatment
		Water intake(mL)	Body weight(g)	Water intake(mL)/Body weight(g)
Control	Y58	33	32	1.03125
	Y59	32	36	0.888889
	Y60	33	35	0.942857
	Y61	32	32	1
	Y62	34	34	1
	Y63	32	33	0.969697
OVX	Y64	45	31	1.45161
	Y65	46	34	1.35294
	Y66	47	32	1.46875
	Y67	46	33	1.39394
	Y68	46	33	1.39394
	Y69	46	32	1.4375
Apigenin	Y25	35	33	1.06061
	Y26	34	32	1.0625
	Y21	34	30	1.13333
	Y22	37	35	1.05714
	Y23	35	33	1.06061
	Y24	35	33	1.06061
E2	Y1	38	35	1.08571
	Y2	37	33	1.12121
	Y3	36	34	1.05882
	Y4	39	36	1.08333
	Y5	40	37	1.08108
	Y6	38	35	1.08571

## Sheet: FIG6CD 12w
12 weeks treatment
		Water intake(mL)	Body weight(g)	Water intake(mL)/Body weight(g)
Control	Y58	43	39	1.10256
	Y59	42	37.4	1.12299
	Y60	43	36	1.19444
	Y61	42	38	1.10526
	Y62	41	39	1.05128
	Y63	40	36	1.11111
OVX	Y64	72	36	2
	Y65	68	39.4	1.72589
	Y66	66	38	1.73684
	Y67	68	37	1.83784
	Y68	70	38	1.84211
	Y69	64	34.5	1.85507
Apigenin	Y25	35	35	1
	Y26	36	34	1.05882
	Y21	36	38	0.947368
	Y22	40	39	1.02564
	Y23	34	35.5	0.957746
	Y24	37	37	1
E2	Y1	46	42	1.09524
	Y2	45	43	1.04651
	Y3	44	43	1.02326
	Y4	43	42	1.02381
	Y5	42	41	1.02439
	Y6	43	41	1.04878
