# Supplementary material for: Apigenin, a Single Active Component of Herbal Extract, Alleviates Xerostomia via ERα-Mediated Upregulation of AQP5 Activation
Source: Front Pharmacol. 2022 Feb 21;13:818116. doi: 10.3389/fphar.2022.818116 (PMC8899471; doi:10.3389/fphar.2022.818116)
Supplement: Supplementary file 10 [file Table1.XLSX]

## Sheet: fig1C
Group	AQP5	P7	AQP5/P7	AVERAGE	STDEV	AQP5/P7(relative)	AVERAGE(relative)	STDEV(relative)	P
PBS	67.26	2046	0.0328739	0.0360622	0.00281197	0.911589	1	0.0779755
	87.91	2368	0.0371242			1.02945
	103.3	2705	0.0381885			1.05896
Dauricine	69.06	2039	0.0338695	0.032714	0.00157069	0.939198	0.907156	0.043555	0.146155
	81.9	2456	0.0333469			0.924705
	76.51	2474	0.0309256			0.857564
Protopine	73.24	2432	0.0301151	0.0352503	0.00558676	0.835089	0.977487	0.15492	0.833129
	57.44	1668	0.0344365			0.954918
	105.8	2568	0.0411994			1.14245
Lentinan	69.58	1632	0.0426348	0.0396308	0.00495693	1.18226	1.09896	0.137455	0.339107
	97.32	2870	0.0339094			0.940303
	108.75	2568	0.0423481			1.17431
Apigenin	194.9	1752	0.111244	0.104226	0.0163423	3.08479	2.89016	0.453169	0.002057
	130.14	1123	0.115886			3.2135
	145.6	1702	0.0855464			2.37219
E2	152.26	2036	0.0747839	0.0689161	0.00664633	2.07375	1.91104	0.184302	0.00139871
	129.32	2096	0.0616985			1.71089
	153.18	2180	0.0702661			1.94847
