# Supplementary material for: Apigenin, a Single Active Component of Herbal Extract, Alleviates Xerostomia via ERα-Mediated Upregulation of AQP5 Activation
Source: Front Pharmacol. 2022 Feb 21;13:818116. doi: 10.3389/fphar.2022.818116 (PMC8899471; doi:10.3389/fphar.2022.818116)
Supplement: Supplementary file 11 [file Table5.XLSX]

## Sheet: FIG6A 0w
Before ovariectomy
Group	No.	Saliva increase weight(mg)	Body weight(g)	Saliva secretion index
Control	Y58	640	30	21.3333
	Y59	590	29	20.3448
	Y60	730	31	23.5484
	Y61	600	29	20.6897
	Y62	560	30	18.6667
	Y63	620	30	20.6667
OVX	Y64	600	31.5	19.0476
	Y65	520	30	17.3333
	Y66	600	29	20.6897
	Y67	600	30	20
	Y68	640	29	22.069
	Y69	610	30	20.3333
Apigenin	Y25	480	29	16.5517
	Y26	600	29	20.6897
	Y21	560	27	20.7407
	Y22	600	33	18.1818
	Y23	600	30	20
	Y24	560	29	19.3103
E2	Y1	590	32	18.4375
	Y2	640	32	20
	Y3	560	31	18.0645
	Y4	640	30	21.3333
	Y5	560	30	18.6667
	Y6	590	30	19.6667

## Sheet: FIG6A 4w
4 weeks treatment
Group	No.	Saliva increase weight(mg)	Body weight(g)	Saliva secretion index
Control	Y58	640	31	20.6452
	Y59	600	32	18.75
	Y60	680	32	21.25
	Y61	680	33	20.6061
	Y62	680	31	21.9355
	Y63	660	32	20.625
OVX	Y64	320	32	10
	Y65	360	31	11.6129
	Y66	440	30	14.6667
	Y67	360	31	11.6129
	Y68	320	32	10
	Y69	360	31	11.6129
Apigenin	Y25	360	30	12
	Y26	400	30	13.3333
	Y21	440	28	15.7143
	Y22	400	33	12.1212
	Y23	400	31	12.9032
	Y24	410	31	13.2258
E2	Y1	440	35	12.5714
	Y2	390	34	11.4706
	Y3	520	32	16.25
	Y4	440	32	13.75
	Y5	570	32	17.8125
	Y6	400	31.5	12.6984

## Sheet: FIG6A 8w
8 weeks treatment
Group	No.	Saliva increase weight(mg)	Body weight(g)	Saliva secretion index
Control	Y58	640	32	20
	Y59	840	36	23.3333
	Y60	800	35	22.8571
	Y61	680	32	21.25
	Y62	760	34	22.3529
	Y63	720	33	21.8182
OVX	Y64	240	31	7.74194
	Y65	400	34	11.7647
	Y66	320	32	10
	Y67	320	33	9.69697
	Y68	320	33	9.69697
	Y69	310	32	9.6875
Apigenin	Y25	560	33	16.9697
	Y26	600	32	18.75
	Y21	600	30	20
	Y22	560	35	16
	Y23	520	33	15.7576
	Y24	580	33	17.5758
E2	Y1	630	35	18
	Y2	730	33	22.1212
	Y3	660	34	19.4118
	Y4	640	36	17.7778
	Y5	840	37	22.7027
	Y6	700	35	20

## Sheet: FIG6AB 12w
12 weeks treatment
Group	No.	Saliva increase weight(mg)	Body weight(g)	Saliva secretion index
Control	Y58	960	39	24.6154
	Y59	920	37.4	24.5989
	Y60	880	36	24.4444
	Y61	840	38	22.1053
	Y62	920	39	23.5897
	Y63	870	36	24.1667
OVX	Y64	360	36	10
	Y65	360	39.4	9.13706
	Y66	360	38	9.47368
	Y67	280	37	7.56757
	Y68	400	38	10.5263
	Y69	320	34.5	9.27536
Apigenin	Y25	840	35	24
	Y26	800	34	23.5294
	Y21	830	38	21.8421
	Y22	840	39	21.5385
	Y23	760	35.5	21.4085
	Y24	830	37	22.4324
E2	Y1	880	42	20.9524
	Y2	920	43	21.3953
	Y3	960	43	22.3256
	Y4	920	42	21.9048
	Y5	1160	41	28.2927
	Y6	900	41	21.9512
